# Supplementary material for: Effects of Succinate on Growth Performance, Meat Quality and Lipid Synthesis in Bama Miniature Pigs
Source: MDPI journal article supplement (doi:10.3390/ani14070999), 2024-03-25
Supplement: s1 [file s1]

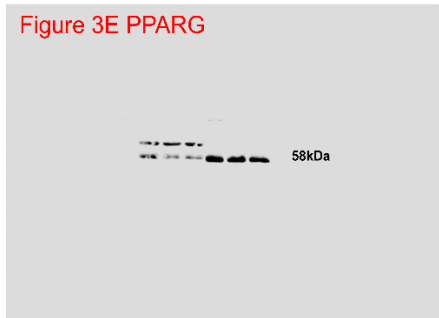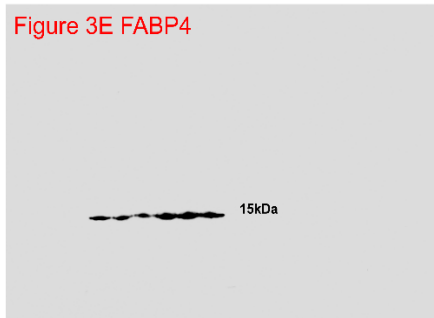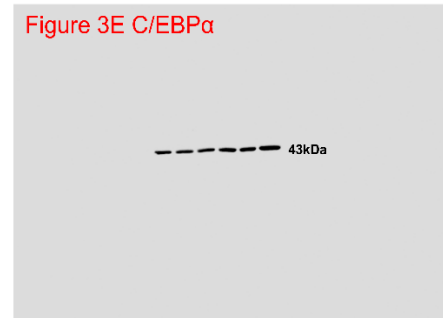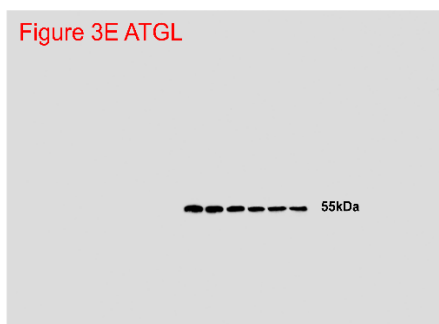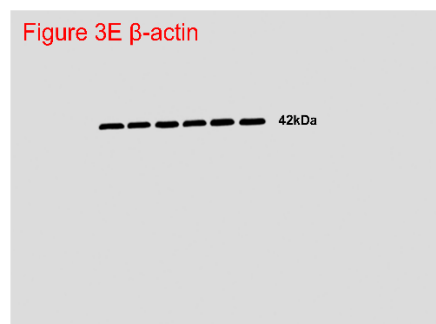

Figure S1: Western blot membrane of PPARG (58 kDa), FABP4 (15 kDa), C/EBPα (43 kDa), ATGL (55kDa) and β-actin (42kDa) protein detected with anti-PPARG (1:1000; ABCAM, Cambridge, UK), anti-FABP4 (1:1000; ABCAM, Cambridge, UK), anti- C/EBPα (1:1000; ABCAM, Cambridge, UK), anti- ATGL (1:1000; ABCAM, Cambridge, UK) and anti-β-actin (1:1000; ABCAM, Cambridge, UK) antibodies, respectively

Figure 4D C/EBP $\alpha$

43kDa

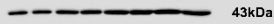

Figure 4D PPARG

58kDa



Figure 4D ATGL

55kDa



Figure 4D  $\beta$ -actin

42kDa



Figure S2: Western blot membrane of PPARG (58 kDa), C/EBP $\alpha$  (43 kDa), ATGL (55kDa) and  $\beta$ -actin (42kDa) protein detected with anti-PPARG (1:1000; ABCAM, Cambridge, UK), anti- C/EBP $\alpha$  (1:1000; ABCAM, Cambridge, UK), anti- ATGL (1:1000; ABCAM, Cambridge, UK) and anti- $\beta$ -actin (1:1000; ABCAM, Cambridge, UK) antibodies, respectively.

Succinyllysine

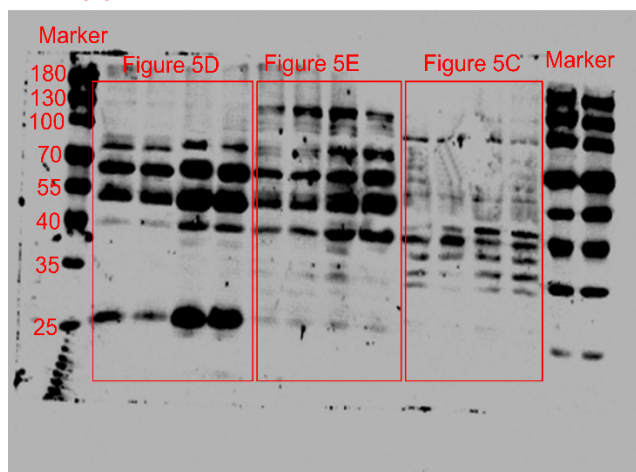

$\beta$ -actin

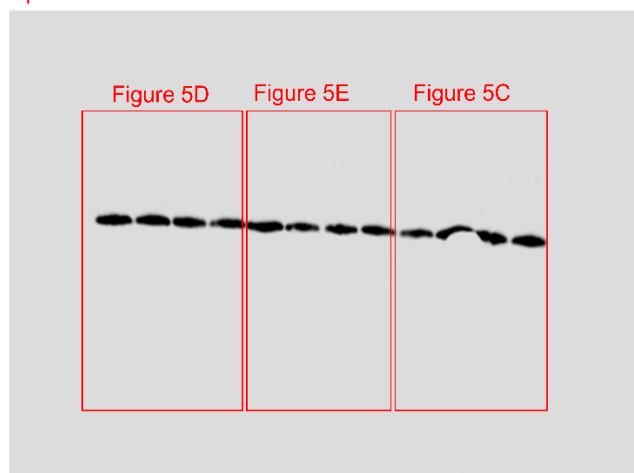

Figure S3: Western blot membrane of succinyllysine and  $\beta$ -actin (42kDa) protein detected with anti-succinyllysine (1:1000; ABCAM, Cambridge, UK) and anti- $\beta$ -actin (1:1000; ABCAM, Cambridge, UK) antibodies, respectively.

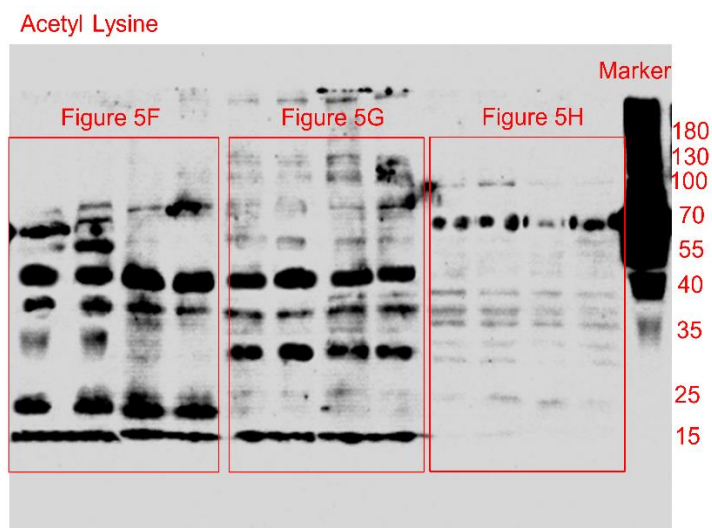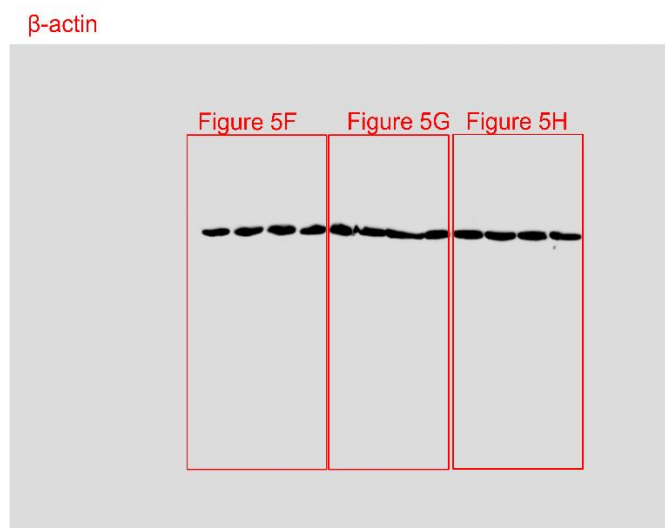

Figure S4: Western blot membrane of acetyl Lysine and  $\beta$ -actin (42kDa) protein detected with an-ti-acetyl Lysine (1:1000; ABCAM, Cambridge, UK) and anti- $\beta$ -actin (1:1000; ABCAM, Cambridge, UK) antibodies, respectively.

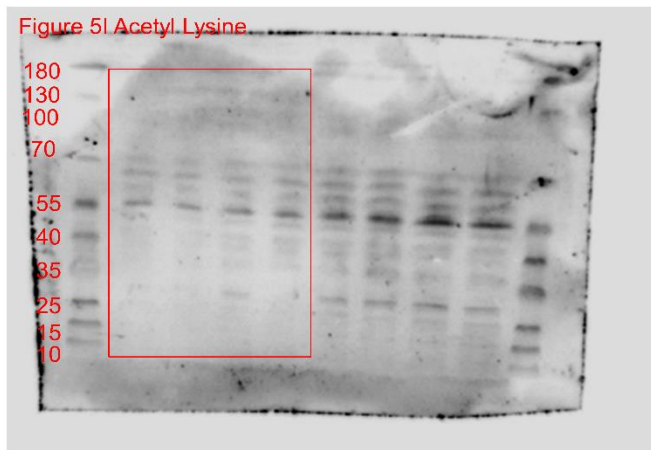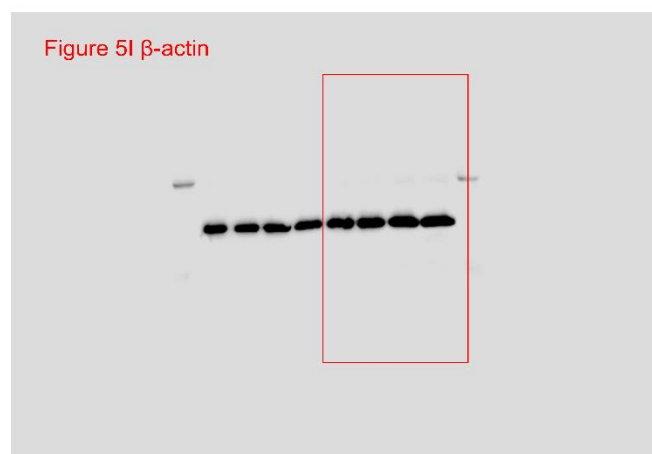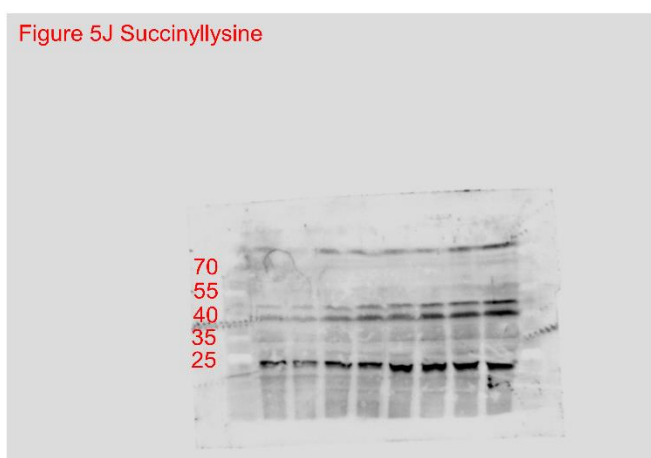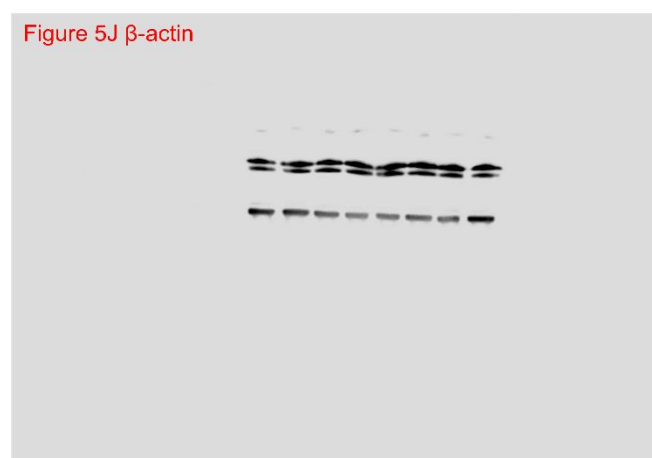

Figure S5: Western blot membrane of succinyllysine, acetyl Lysine and  $\beta$ -actin (42kDa) protein detected with anti-succinyllysine (1:1000; ABCAM, Cambridge, UK), anti-acetyl Lysine (1:1000; ABCAM, Cambridge, UK) and anti- $\beta$ -actin (1:1000; ABCAM, Cambridge, UK) antibodies, respectively.
